# Supplementary material for: The Influence of the Exclusion of Central Necrosis on [18F]FDG PET Radiomic Analysis
Source: MDPI journal article supplement (doi:10.3390/diagnostics11071296), 2021-07-19
Supplement: s1 [file s1]

## Supplementary File 1: Image Biomarker Standardisation Initiative Reporting Guidelines

### Patient

|                                                                                                                                                                                                                                  | NSCLC                                                                                                                                                                                                                                                                                                                                                                                                                                                                                                                                                                                                    | PPGL                                                                                                                                                                                                                                                                                                                                                                                                                                                                                                                                                                                                                                              |
|----------------------------------------------------------------------------------------------------------------------------------------------------------------------------------------------------------------------------------|----------------------------------------------------------------------------------------------------------------------------------------------------------------------------------------------------------------------------------------------------------------------------------------------------------------------------------------------------------------------------------------------------------------------------------------------------------------------------------------------------------------------------------------------------------------------------------------------------------|---------------------------------------------------------------------------------------------------------------------------------------------------------------------------------------------------------------------------------------------------------------------------------------------------------------------------------------------------------------------------------------------------------------------------------------------------------------------------------------------------------------------------------------------------------------------------------------------------------------------------------------------------|
| 1. Volumes of interest                                                                                                                                                                                                           | NSCLC showing central necrosis based on semi-automatic threshold-based tumour delineation                                                                                                                                                                                                                                                                                                                                                                                                                                                                                                                | PPGL showing central necrosis based on semi-automatic threshold-based tumour delineation                                                                                                                                                                                                                                                                                                                                                                                                                                                                                                                                                          |
| 2. Patient preparation <ul style="list-style-type: none"> <li>a. Patient instructions</li> <li>b. Drugs</li> <li>c. Equipment</li> </ul>                                                                                         | Patients fasted for at least 6 hours before imaging and were orally hydrated with 500 mL of water.                                                                                                                                                                                                                                                                                                                                                                                                                                                                                                       |                                                                                                                                                                                                                                                                                                                                                                                                                                                                                                                                                                                                                                                   |
| 3. Radioactive tracer: <ul style="list-style-type: none"> <li>a. Tracer</li> <li>b. Administration method</li> <li>c. Injected activity</li> <li>d. Uptake time prior to acquisition</li> <li>e. Competing substances</li> </ul> | <p>Dynamic [<math>^{18}\text{F}</math>]FDG PET was performed for one bed-position with the tumour centrally located in the field of view. Directly after the start of the acquisition, a standardized infusion of 3.45 MBq of [<math>^{18}\text{F}</math>]FDG per kilogram of body weight was started. The intravenous administration was injected in an intracubital vein contralateral to the tumor by using a standardized injection protocol (8.0 mL at 0.2 mL/sec) with a remote-controlled pump, followed by a saline flush (40 mL at 8.0 mL/sec). Serum glucose levels were below 8.0 mmol/L.</p> | <p>PET acquisition was started 60 (55-75) minutes after intravenous administration of [<math>^{18}\text{F}</math>]FDG in an intracubital vein, using a non-linear dosage (D) regimen:</p> <ul style="list-style-type: none"> <li>- &lt;95 kg body weight (BW): <math>D = 1.7 \times \text{BW}</math> (4 min per bed position)</li> <li>- &gt;95 kg BW: <math>D = 0.017778 \times W^2</math> (4 min per bed position)</li> <li>- 3 min/bed position: <math>D \times 1.333</math></li> <li>- 2 min/bed position: <math>D \times 2</math></li> <li>- Maximum: 555 MBq, minimum: 20 MBq</li> </ul> <p>Serum glucose levels were below 8.0 mmol/L.</p> |
| 4. Contrast agent                                                                                                                                                                                                                | NA                                                                                                                                                                                                                                                                                                                                                                                                                                                                                                                                                                                                       |                                                                                                                                                                                                                                                                                                                                                                                                                                                                                                                                                                                                                                                   |
| 5. Comorbidities                                                                                                                                                                                                                 | Patients with DM were allowed as long as serum glucose was below 8.0 mmol/L and no short-acting insulins were given 4 hours prior to injection of FDG.                                                                                                                                                                                                                                                                                                                                                                                                                                                   | Patients with DM were allowed as long as serum glucose was below 8.0 mmol/L and no short-acting insulins were given 4 hours prior to injection of FDG. In case of high serum levels of catecholamines                                                                                                                                                                                                                                                                                                                                                                                                                                             |

|  |                                                          |                                                                                                                                                                                                                                                                                    |
|--|----------------------------------------------------------|------------------------------------------------------------------------------------------------------------------------------------------------------------------------------------------------------------------------------------------------------------------------------------|
|  | Patients with active pulmonary infections were excluded. | it is known that brown adipose tissue (BAT) uptake can be strongly increased. As BAT can be present in the perirenal fossa, it could interfere with delineation of the pheochromocytoma. Patients with pheochromocytomas and high BAT uptake in the perirenal fossa were excluded. |
|--|----------------------------------------------------------|------------------------------------------------------------------------------------------------------------------------------------------------------------------------------------------------------------------------------------------------------------------------------------|

## Acquisition

|                                                                                                                                                                             | NSCLC                                                                                                                                                                                                                                                                                                              | PPGL                                                                                                                                              |
|-----------------------------------------------------------------------------------------------------------------------------------------------------------------------------|--------------------------------------------------------------------------------------------------------------------------------------------------------------------------------------------------------------------------------------------------------------------------------------------------------------------|---------------------------------------------------------------------------------------------------------------------------------------------------|
| 6. Acquisition protocol                                                                                                                                                     | After performing low-dose breath-hold CT, free-breathing PET acquisition was performed for 60 minutes.                                                                                                                                                                                                             | A low-dose CT was performed, followed by a static PET scan, from the base of the skull to the mid-thigh, approximately 60 minutes post-injection. |
| 7. Scanner type                                                                                                                                                             | Siemens Biograph Duo and Siemens Biograph 40 mCT (Siemens Healthineers, Erlangen, Germany)                                                                                                                                                                                                                         | Siemens Biograph 40 mCT (Siemens Healthineers, Erlangen, Germany)                                                                                 |
| 8. Imaging modality                                                                                                                                                         | PET/CT                                                                                                                                                                                                                                                                                                             |                                                                                                                                                   |
| 9. Static/dynamic scans <ul style="list-style-type: none"> <li>a. Static/dynamic</li> <li>b. Acquisition time per frame</li> <li>c. Temporal modelling technique</li> </ul> | Dynamic scans <ul style="list-style-type: none"> <li>20 x 5 s</li> <li>5 x 10 s</li> <li>10 x 15 s</li> <li>10 x 30 s</li> <li>16 x 75 s</li> <li>8 x 150 s</li> <li>1 x 600 s</li> </ul> Only the final time frame (50–60 min p.i.) was used in this analysis. Temporal modelling was not used for this analysis. | Static scans                                                                                                                                      |
| 10. Scanner calibration                                                                                                                                                     | All PET/CT scanners were regularly cross-calibrated with the dose calibrator of the hospital pharmacy and the dose calibrator of the pharmacy that delivers the FDG according to EARL-guidelines and guidelines for quality control of the Dutch Association of Nuclear Medicine (NVNG).                           |                                                                                                                                                   |
| 11. Patient instructions                                                                                                                                                    | Free-breathing PET scans were acquired with the patient instructed not to move and positioned in restraining/supportive devices.                                                                                                                                                                                   |                                                                                                                                                   |

|                                  |                                                                                                                                                                                                |                                                    |
|----------------------------------|------------------------------------------------------------------------------------------------------------------------------------------------------------------------------------------------|----------------------------------------------------|
| 12. Anatomical motion correction | No anatomical motion correction is performed, due to the hybrid nature of PET-CT it is assumed that the position of PET and CT with respect to the scanner's coordinate system stays constant. |                                                    |
| 13. Scan duration                | 60 minutes. The final time frame (50–60 min p.i.) was used in this analysis.                                                                                                                   | 3 or 4 min/bed position, dose adjusted accordingly |
| 14. Tube voltage IdCT            | 130 kVp                                                                                                                                                                                        | 130 kVp                                            |
| 15. Tube current IdCT            | 40 mA                                                                                                                                                                                          | 40 mA                                              |
| 16. Time-of-flight               | Biograph Duo: no<br>Biograph mCT: yes                                                                                                                                                          | Yes                                                |

## Reconstruction

|                                                                                           | NSCLC                                                                                                                 |                                                                                           | PPGL                      |
|-------------------------------------------------------------------------------------------|-----------------------------------------------------------------------------------------------------------------------|-------------------------------------------------------------------------------------------|---------------------------|
|                                                                                           | Biograph Duo                                                                                                          | Biograph 40 mCT                                                                           | Biograph 40 mCT           |
| 28. In plane resolution                                                                   | 2.65×2.65 mm <sup>2</sup>                                                                                             | 1.59×1.59 mm <sup>2</sup>                                                                 | 3.18×3.18 mm <sup>2</sup> |
| 29. Image slice thickness                                                                 | 3.38 mm                                                                                                               | 2.03 mm                                                                                   | 3.00 mm                   |
| 30. Image slice spacing                                                                   | 3.38 mm                                                                                                               | 2.03 mm                                                                                   | 3.00 mm                   |
| 32. Reconstruction method<br>a. Method<br>b. Number of iterations<br>c. Number of subsets | Ordered-subsets expectation maximization with 4 iterations per 16 subsets                                             | High-definition ordered-subsets expectation maximization with 3 iterations per 21 subsets |                           |
| 33. Point spread function modelling                                                       | NA                                                                                                                    | Point spread function based time of flight                                                |                           |
| 34. Image corrections<br>a. Attenuation correction<br>b. Other corrections                | AC: based on low-dose CT<br>Correction for scatter, randoms, normalization, dead time and physical decay was applied. |                                                                                           |                           |

## Image processing – data conversion

|                            | NSCLC        |                 | PPGL            |
|----------------------------|--------------|-----------------|-----------------|
|                            | Biograph Duo | Biograph 40 mCT | Biograph 40 mCT |
| 38. SUV normalisation      | NA           |                 |                 |
| 40. Other data conversions | NA           |                 |                 |

## Image processing – post acquisition processing

|                   | NSCLC        |                 | PPGL            |
|-------------------|--------------|-----------------|-----------------|
|                   | Biograph Duo | Biograph 40 mCT | Biograph 40 mCT |
| 41. Anti-aliasing | NA           |                 |                 |

|                                               |               |               |               |
|-----------------------------------------------|---------------|---------------|---------------|
| 42. Noise suppression                         | NA            |               |               |
| 43. Post-reconstruction smoothing filter      | 5 mm Gaussian | 3 mm Gaussian | 8 mm Gaussian |
| 46. Intensity normalisation                   | NA            |               |               |
| 47. Other post-acquisition processing methods | NA            |               |               |

## Segmentation

|                                                       | NSCLC                                                                                                                                                                                                                                                        | PPGL |
|-------------------------------------------------------|--------------------------------------------------------------------------------------------------------------------------------------------------------------------------------------------------------------------------------------------------------------|------|
| 48. Segmentation method                               | VOIs were delineated semi-automatically using 3DSlicer ( <a href="http://www.slicer.org">www.slicer.org</a> ) and in-house built software implemented in Python 3.7 (Python Software Foundation, Wilmington, Delaware).                                      |      |
| a. Method                                             |                                                                                                                                                                                                                                                              |      |
| b. Number of experts, expertise, consensus strategies |                                                                                                                                                                                                                                                              |      |
| c. Settings                                           | VOI <sub>vital-tumour</sub> : delineated using a 41% isocontour method of the SUV <sub>peak</sub> , obtained using a sphere of 12 mm diameter, corrected for local background, boxing was applied to exclude surrounding [ <sup>18</sup> F]FDG-avid tissues. |      |
| d. Images                                             | VOI <sub>gross-tumour</sub> : manual addition of the volumes of central necrosis to VOI <sub>vital-tumour</sub> , using low-dose CT as a visual reference.                                                                                                   |      |
|                                                       | VOIs were delineated by WN (PhD candidate PET radiomics with 3 years of experience) and supervised by DV (nuclear medicine physician with 12 years of experience)                                                                                            |      |
| 49. Conversion to mask                                | NA                                                                                                                                                                                                                                                           |      |

## Image processing – image interpolation

|                                   | NSCLC                                                                                                                                                    | PPGL |
|-----------------------------------|----------------------------------------------------------------------------------------------------------------------------------------------------------|------|
| 50. Interpolation algorithm       | Trilinear interpolation using MATLAB 2017b (Mathworks, Natick, Massachusetts), grids were aligned by centre, values were rounded to the nearest integer. | NA   |
| a. Algorithm                      |                                                                                                                                                          |      |
| b. Interpolation grid             |                                                                                                                                                          |      |
| c. Dimensions                     |                                                                                                                                                          |      |
| d. Extrapolation                  |                                                                                                                                                          |      |
| 51. Interpolated voxel dimensions | 3.38×3.38×3.38 mm <sup>3</sup>                                                                                                                           | NA   |

## Image processing – ROI interpolation and re-segmentation

|                             | NSCLC                                           | PPGL |
|-----------------------------|-------------------------------------------------|------|
| 53. Interpolation algorithm | NA, VOIs were delineated on interpolated images | NA   |
| 54. Partially masked voxels | NA                                              | NA   |
| 55. Re-segmentation methods | NA                                              | NA   |

### Image processing – discretisation

|                                                                                                       |                                                                                                                                                                                |
|-------------------------------------------------------------------------------------------------------|--------------------------------------------------------------------------------------------------------------------------------------------------------------------------------|
| 56. Discretisation method<br>a. Method<br>b. Number of bins/bin size<br>c. Lowest intensity first bin | Discretisation using a fixed bin size of 0.5 g/mL. Bin edges were equally spaced from 0 (e.g. 0-0.5, 0.5-1, etc) and the lowest grey value was discretized into the first bin. |
|-------------------------------------------------------------------------------------------------------|--------------------------------------------------------------------------------------------------------------------------------------------------------------------------------|

### Image processing – image transformation

|                  |    |    |
|------------------|----|----|
| 57. Image filter | NA | NA |
|------------------|----|----|

### Image biomarker computation

|                   |                                                                                                                                                                                                                                                                                                                                                                                                                                                                                                                                                                                                                                                                                                                                                                                                                                                                                                                                                                                                                                                                                                                                                                                                                                                                                                                                                                                                                                                                                                                                                                                                                                                                |
|-------------------|----------------------------------------------------------------------------------------------------------------------------------------------------------------------------------------------------------------------------------------------------------------------------------------------------------------------------------------------------------------------------------------------------------------------------------------------------------------------------------------------------------------------------------------------------------------------------------------------------------------------------------------------------------------------------------------------------------------------------------------------------------------------------------------------------------------------------------------------------------------------------------------------------------------------------------------------------------------------------------------------------------------------------------------------------------------------------------------------------------------------------------------------------------------------------------------------------------------------------------------------------------------------------------------------------------------------------------------------------------------------------------------------------------------------------------------------------------------------------------------------------------------------------------------------------------------------------------------------------------------------------------------------------------------|
| 58. Biomarker set | <ul style="list-style-type: none"> <li>• First Order Statistics (18 features): 10th Percentile, 90th Percentile, Energy, Entropy, Interquartile range, Kurtosis, Maximum, Mean absolute deviation, Mean, Median, Minimum, Range, Robust mean absolute deviation, Root mean squared, Skewness, Total energy, Uniformity, Variance</li> <li>• Shape based (14 features): Elongation, Flatness, Least axis length, Major axis length, Maximum 2D diameter column, Maximum 2D diameter row, Maximum 2D diameter slice, Maximum 3D diameter, Mesh volume, Minor axis length, Sphericity, Surface area, Surface volume ratio, Voxel volume</li> <li>• Grey Level Cooccurrence Matrix (GLCM; 22 features): Autocorrelation, Joint Average, Cluster Prominence, Cluster Shade, Cluster Tendency, Contrast, Correlation, Difference Average, Difference Entropy, Difference Variance, Joint Energy (= Angular Second Moment), Joint Entropy, Informational Measure of Correlation 1, Informational Measure of Correlation 2, Inverse Difference Moment, Inverse Difference Moment Normalized, Inverse Difference, Inverse Difference Normalized, Inverse Variance, Maximum Probability (= Joint Maximum), Sum Entropy, Sum of Squares (=Joint Variance)</li> <li>• Grey Level Run Length Matrix (GLRLM; 16 features): Short Run Emphasis, Long Run Emphasis, Grey Level Non-Uniformity, Grey Level Non-Uniformity Normalized, Run Length Non-Uniformity, Run Length Non-Uniformity Normalized, Run Percentage, Grey Level Variance, Run Variance, Run Entropy, Low Grey Level Run Emphasis, High Grey Level Run Emphasis, Short Run Low Grey Level Emphasis,</li> </ul> |
|-------------------|----------------------------------------------------------------------------------------------------------------------------------------------------------------------------------------------------------------------------------------------------------------------------------------------------------------------------------------------------------------------------------------------------------------------------------------------------------------------------------------------------------------------------------------------------------------------------------------------------------------------------------------------------------------------------------------------------------------------------------------------------------------------------------------------------------------------------------------------------------------------------------------------------------------------------------------------------------------------------------------------------------------------------------------------------------------------------------------------------------------------------------------------------------------------------------------------------------------------------------------------------------------------------------------------------------------------------------------------------------------------------------------------------------------------------------------------------------------------------------------------------------------------------------------------------------------------------------------------------------------------------------------------------------------|

|                           |                                                                                                                                                                                                                                                                                                                                                                                                                                                                                                                                                                                                                                                                                                                                                                                                                                                                                                                                                                                                                                                                                                                                                                                                                                                                                                                       |
|---------------------------|-----------------------------------------------------------------------------------------------------------------------------------------------------------------------------------------------------------------------------------------------------------------------------------------------------------------------------------------------------------------------------------------------------------------------------------------------------------------------------------------------------------------------------------------------------------------------------------------------------------------------------------------------------------------------------------------------------------------------------------------------------------------------------------------------------------------------------------------------------------------------------------------------------------------------------------------------------------------------------------------------------------------------------------------------------------------------------------------------------------------------------------------------------------------------------------------------------------------------------------------------------------------------------------------------------------------------|
|                           | <p>Short Run High Grey Level Emphasis, Long Run Low Grey Level Emphasis, Long Run High Grey Level Emphasis</p> <ul style="list-style-type: none"> <li>• Grey Level Size Zone Matrix (GLSZM; 16 features): Small Area Emphasis, Large Area Emphasis, Grey Level Non-Uniformity, Grey Level Non-Uniformity Normalized, Size-Zone Non-Uniformity, Size-Zone Non-Uniformity Normalized, Zone Percentage, Grey Level Variance, Zone Variance, Zone Entropy, Low Grey Level Zone Emphasis, High Grey Level Zone Emphasis, Small Area Low Grey Level Emphasis, Small Area High Grey Level Emphasis, Large Area Low Grey Area Emphasis, Large Area High Grey Level Emphasis</li> <li>• Grey Level Dependence Matrix (GLDM; 14 features): Small Dependence Emphasis, Large Dependence Emphasis, Grey Level Non-Uniformity, Dependence Non-Uniformity, Dependence Non-Uniformity Normalized, Grey Level Variance, Dependence Variance, Dependence Entropy, Low Grey Level Emphasis, High Grey Level Emphasis, Small Dependence Low Grey Level Emphasis, Small Dependence High Grey Level Emphasis, Large Dependence Low Grey Level Emphasis, Large Dependence High Grey Level Emphasis</li> <li>• Neighbouring Grey Tone Difference Matrix (NGTDM; 5 features): Coarseness, Contrast, Busyness, Complexity, Strength</li> </ul> |
| 59. IBSI compliance       | Yes                                                                                                                                                                                                                                                                                                                                                                                                                                                                                                                                                                                                                                                                                                                                                                                                                                                                                                                                                                                                                                                                                                                                                                                                                                                                                                                   |
| 60. Robustness            | Not assessed                                                                                                                                                                                                                                                                                                                                                                                                                                                                                                                                                                                                                                                                                                                                                                                                                                                                                                                                                                                                                                                                                                                                                                                                                                                                                                          |
| 61. Software availability | PyRadiomics 3.0 in Python 3.7 (Python Software Foundation, Wilmington, Delaware)                                                                                                                                                                                                                                                                                                                                                                                                                                                                                                                                                                                                                                                                                                                                                                                                                                                                                                                                                                                                                                                                                                                                                                                                                                      |

#### Image biomarker computation – texture parameters

|                                                       |                                                        |
|-------------------------------------------------------|--------------------------------------------------------|
| 62. Texture matrix aggregation                        | GLCM and GLRLM: 3D: average; GLSZM, GLDM and NGTDM: 3D |
| 63. Distance weighting                                | No weighting                                           |
| 64. Cooccurrence matrix symmetry                      | Symmetric                                              |
| 65. Cooccurrence matrix distance                      | Chebyshev distance of 1                                |
| 66. Size zone matrix linkage distance                 | Chebyshev distance of 1                                |
| 67. Distance zone matrix linkage distance             | NA                                                     |
| 68. Distance zone matrix distance norm                | NA                                                     |
| 69. Neighbouring grey tone difference matrix distance | Chebyshev distance of 1                                |

|                                             |                         |
|---------------------------------------------|-------------------------|
| 70. Grey level dependence matrix distance   | Chebyshev distance of 1 |
| 71. Grey level dependence matrix coarseness | 0                       |

### Machine learning and radiomics analysis

|                                                                                                                                                                                                               |                                                                                                                                                                                                                                                                                                                                                                                                                                                                                                                                                                                                                                                                                                                                                                                                                                                                                                                                                                                                                                                                                                                                                                                                                                                                                                                                                             |
|---------------------------------------------------------------------------------------------------------------------------------------------------------------------------------------------------------------|-------------------------------------------------------------------------------------------------------------------------------------------------------------------------------------------------------------------------------------------------------------------------------------------------------------------------------------------------------------------------------------------------------------------------------------------------------------------------------------------------------------------------------------------------------------------------------------------------------------------------------------------------------------------------------------------------------------------------------------------------------------------------------------------------------------------------------------------------------------------------------------------------------------------------------------------------------------------------------------------------------------------------------------------------------------------------------------------------------------------------------------------------------------------------------------------------------------------------------------------------------------------------------------------------------------------------------------------------------------|
| <p>72. Diagnostic and prognostic modelling</p> <ol style="list-style-type: none"> <li>Objective</li> <li>Population</li> <li>Outcome</li> <li>Predictors</li> <li>Performance</li> <li>Limitations</li> </ol> | <p>Compare predictive performances of radiomic models based on different delineation methods (adaptive threshold 41% SUV<sub>peak</sub> (VOI<sub>vital-tumour</sub>), central necrosis filled (VOI<sub>gross-tumour</sub>) and combined)</p> <p>31 patients with pheochromocytomas and paragangliomas, retrospectively included</p> <p>Noradrenergic biochemical profile (yes: 13, no: 18)</p> <p>Radiomic features as assessed redundancy filtering and factor analysis, 1 feature per 10 patients:</p> <ul style="list-style-type: none"> <li>- VOI<sub>vital-tumour</sub>: First order Minimum, Shape Surface Area, GLCM Informational Measure of Correlation 2</li> <li>- VOI<sub>gross-tumour</sub>: Shape Surface Area*, NGTDM Complexity, GLDM Dependence Entropy</li> <li>- Combined: VOI<sub>gross-tumour</sub> GLCM Sum entropy, VOI<sub>vital-tumour</sub> Shape maximum 3D diameter, VOI<sub>vital-tumour</sub> Shape Surface Volume ratio</li> </ul> <p>AUCs (95% CI):</p> <ul style="list-style-type: none"> <li>- VOI<sub>vital-tumour</sub>: 0.829 (0.677-0.981)</li> <li>- VOI<sub>gross-tumour</sub>: 0.803 (0.640-0.967)</li> <li>- Combined: 0.791 (0.618-0.963)</li> </ul> <p>Model was used for the comparison of predictive performance between delineation methods and was not developed and validated for predictive purposes.</p> |
| 73. Comparison with known factors                                                                                                                                                                             | NA                                                                                                                                                                                                                                                                                                                                                                                                                                                                                                                                                                                                                                                                                                                                                                                                                                                                                                                                                                                                                                                                                                                                                                                                                                                                                                                                                          |
| 74. Multicollinearity                                                                                                                                                                                         | Unsupervised dimension reduction using redundancy filtering (threshold = 0.9) and factor analysis was performed using FMradio (Factor Modeling for Radiomics Data).                                                                                                                                                                                                                                                                                                                                                                                                                                                                                                                                                                                                                                                                                                                                                                                                                                                                                                                                                                                                                                                                                                                                                                                         |
| 75. Model availability                                                                                                                                                                                        | Model was used for the comparison of predictive performance between delineation methods and was not developed and validated for predictive purposes.                                                                                                                                                                                                                                                                                                                                                                                                                                                                                                                                                                                                                                                                                                                                                                                                                                                                                                                                                                                                                                                                                                                                                                                                        |
| 76. Data availability                                                                                                                                                                                         | The datasets generated during and/or analysed during the current study are available from the corresponding author on reasonable request.                                                                                                                                                                                                                                                                                                                                                                                                                                                                                                                                                                                                                                                                                                                                                                                                                                                                                                                                                                                                                                                                                                                                                                                                                   |
