# Supplementary material for: The Influence of the Exclusion of Central Necrosis on [18F]FDG PET Radiomic Analysis
Source: MDPI journal article supplement (doi:10.3390/diagnostics11071296), 2021-07-19
Supplement: s1 [file s1]

|                                     |    |    |    |    |    |   |   |    |    |
|-------------------------------------|----|----|----|----|----|---|---|----|----|
| Run entropy                         | ✓  | ✓  | ✓  | ✓  | ✓  | ✓ | ✓ | ✓  | ✓  |
| Run length nonuniformity            | ✓  | ✓  | ✓  | ✓  | ✓  | ✓ | ✓ | ✓  | ✓  |
| Run length nonuniformity normalized | ✓  | ✓  | ✓  | ✓  | ✓  | ✓ |   | ✓  | ✓  |
| Run percentage                      |    | ✓  | ✓  |    | ✓  | ✓ |   |    | ✓  |
| Run variance                        |    | ✓  | ✓  | ✓  | ✓  | ✓ |   | ✓  | ✓  |
| Short run emphasis                  | ✓  | ✓  | ✓  | ✓  | ✓  | ✓ |   |    | ✓  |
| Short run high grey level emphasis  | ✓  | ✓  | ✓  | ✓  | ✓  | ✓ | ✓ | ✓  | ✓  |
| Short run low grey level emphasis   | ✓  | ✓  | ✓  | ✓  | ✓  | ✓ | ✓ | ✓  | ✓  |
| GLSZM (16)                          | 11 | 13 | 12 | 12 | 15 | 9 | 7 | 11 | 12 |
| Grey level nonuniformity            |    |    |    | ✓  | ✓  |   |   |    |    |
| Grey level nonuniformity normalized | ✓  | ✓  | ✓  | ✓  | ✓  | ✓ | ✓ | ✓  | ✓  |
| Grey level variance                 | ✓  | ✓  | ✓  | ✓  | ✓  | ✓ | ✓ | ✓  | ✓  |
| High grey level zone emphasis       | ✓  | ✓  | ✓  | ✓  | ✓  | ✓ | ✓ | ✓  | ✓  |
| Large area emphasis                 |    | ✓  | ✓  | ✓  | ✓  |   |   | ✓  |    |
| Large area high grey level emphasis | ✓  | ✓  | ✓  | ✓  | ✓  | ✓ | ✓ | ✓  | ✓  |
| Large area low grey level emphasis  |    | ✓  |    |    | ✓  |   |   |    |    |
| Low grey level zone emphasis        | ✓  | ✓  | ✓  | ✓  | ✓  | ✓ | ✓ | ✓  | ✓  |
| Size zone nonuniformity             |    |    |    |    |    |   |   |    | ✓  |
| Size zone nonuniformity normalized  | ✓  | ✓  | ✓  | ✓  | ✓  |   |   | ✓  | ✓  |
| Small area emphasis                 | ✓  |    |    |    | ✓  |   |   |    | ✓  |



|                                                |    |    |    |    |    |    |    |    |    |
|------------------------------------------------|----|----|----|----|----|----|----|----|----|
| Small dependence<br>low grey level<br>emphasis | ✓  | ✓  | ✓  | ✓  | ✓  | ✓  | ✓  | ✓  | ✓  |
| NGTDM (5)                                      | 4  | 4  | 4  | 5  | 5  | 2  | 2  | 4  | 4  |
| Busyness                                       | ✓  | ✓  | ✓  | ✓  | ✓  | ✓  | ✓  | ✓  | ✓  |
| Coarseness                                     |    |    |    | ✓  | ✓  |    |    |    |    |
| Complexity                                     | ✓  | ✓  | ✓  | ✓  | ✓  | ✓  | ✓  | ✓  | ✓  |
| Contrast                                       | ✓  | ✓  | ✓  | ✓  | ✓  |    |    | ✓  | ✓  |
| Strength                                       | ✓  | ✓  | ✓  | ✓  | ✓  |    |    | ✓  | ✓  |
| Total (105)                                    | 83 | 86 | 68 | 71 | 84 | 75 | 59 | 69 | 73 |
