# Supplementary material for: The Influence of the Exclusion of Central Necrosis on [18F]FDG PET Radiomic Analysis
Source: Diagnostics (Basel). 2021 Jul 19;11(7):1296. doi: 10.3390/diagnostics11071296 (PMC8304274; doi:10.3390/diagnostics11071296)
Supplement: Supplementary file 1 [file diagnostics-11-01296-s001.zip]

Archive with 5 entries (5 files):
- Supplementals diagnostics/Fig1.tif
- Supplementals diagnostics/Fig2.tif
- Supplementals diagnostics/Fig3.tif
- Supplementals diagnostics/supplemental 1.pdf
- Supplementals diagnostics/supplementary table S1.pdf
